# Supplementary material for: Molecular identification and phylogenetic analysis of confusing Tetrastigma species based on DNA barcoding and chloroplast genome
Source: Front Pharmacol. 2025 Jul 11;16:1607947. doi: 10.3389/fphar.2025.1607947 (PMC12289577; doi:10.3389/fphar.2025.1607947)
Supplement: Supplementary file 4 [file Table4.xlsx]

## Sheet: Sheet1
Window	Midpoint	Pi
1-826	526	0.01509
417-1026	726	0.00814
627-1226	926	0.00571
827-1426	1126	0.00446
1027-1626	1326	0.00429
1227-1876	1526	0.00911
1427-2088	1726	0.01094
1627-2294	1977	0.01544
1877-2494	2194	0.01077
2089-2694	2394	0.01151
2295-2894	2594	0.01051
2495-3094	2794	0.01061
2695-3294	2994	0.00903
2895-3494	3194	0.01058
3095-3703	3394	0.00974
3295-3923	3594	0.01161
3495-4134	3813	0.00978
3704-4334	4028	0.01222
3924-4535	4234	0.01044
4135-4786	4435	0.01119
4335-5016	4638	0.01475
4536-5231	4899	0.01909
4787-5431	5130	0.01865
5017-5650	5331	0.01385
5232-5883	5539	0.00936
5432-6083	5777	0.00789
5651-6333	5983	0.01056
5884-6560	6203	0.01025
6084-6897	6434	0.01195
6334-8315	6665	0.01109
6561-8548	8192	0.01567
6898-8763	8423	0.01456
8316-8963	8663	0.01319
8549-9173	8863	0.00875
8764-9376	9073	0.00924
8964-9717	9273	0.01282
9174-9917	9499	0.0152
9377-10140	9817	0.01419
9718-10371	10021	0.0136
9918-10651	10271	0.0176
10141-10983	10518	0.02458
10372-11193	10856	0.02301
10652-11395	11093	0.0161
10984-11599	11294	0.01034
11194-11803	11495	0.00865
11396-12003	11700	0.00882
11600-12211	11903	0.01006
11804-12459	12103	0.01273
12004-12659	12323	0.01528
12212-12859	12559	0.01208
12460-13059	12759	0.00667
12660-13259	12959	0.00411
12860-13459	13159	0.00398
13060-13659	13359	0.00359
13260-13859	13559	0.00245
13460-14060	13759	0.00179
13660-14260	13959	0.00355
13860-14460	14160	0.00669
14061-14666	14360	0.0089
14261-14879	14565	0.0094
14461-15084	14767	0.00705
14667-15284	14979	0.00455
14880-15496	15184	0.0087
15085-15730	15384	0.01218
15285-15932	15605	0.01417
15497-16132	15832	0.00877
15731-16332	16032	0.00783
15933-16572	16232	0.0069
16133-16812	16444	0.00835
16333-17018	16679	0.00892
16573-17218	16912	0.00735
16813-17418	17118	0.00672
17019-17618	17318	0.00493
17219-17829	17518	0.00603
17419-18032	17724	0.00613
17619-18232	17932	0.00512
17830-18432	18132	0.00461
18033-18632	18332	0.00419
18233-18857	18532	0.00669
18433-19057	18747	0.01012
18633-19263	18957	0.00958
18858-19463	19163	0.00713
19058-19663	19363	0.004
19264-19863	19563	0.006
19464-20063	19763	0.00853
19664-20263	19963	0.00873
19864-20469	20163	0.00811
20064-20669	20369	0.00782
20264-20875	20569	0.00939
20470-21075	20769	0.01074
20670-21275	20975	0.01012
20876-21475	21175	0.0112
21076-21675	21375	0.0092
21276-21875	21575	0.00702
21476-22075	21775	0.0058
21676-22275	21975	0.00547
21876-22475	22175	0.00763
22076-22675	22375	0.00511
22276-22875	22575	0.00462
22476-23075	22775	0.00206
22676-23279	22975	0.00571
22876-23479	23175	0.00711
23076-23679	23379	0.0082
23280-23879	23579	0.0045
23480-24079	23779	0.00438
23680-24279	23979	0.00471
23880-24479	24179	0.00625
24080-24679	24379	0.00517
24280-24879	24579	0.00555
24480-25088	24779	0.0042
24680-25304	24988	0.00928
24880-25519	25199	0.00895
25089-25720	25411	0.0099
25305-25920	25620	0.00431
25520-26121	25820	0.00461
25721-26321	26020	0.00353
25921-26521	26221	0.00392
26122-26721	26421	0.00176
26322-26921	26621	0.00225
26522-27127	26821	0.00375
26722-27327	27027	0.00553
26922-27527	27227	0.00555
27128-27727	27427	0.00585
27328-27927	27627	0.00581
27528-28130	27827	0.00761
27728-28330	28030	0.00543
27928-28530	28230	0.00531
28131-28730	28430	0.00542
28331-28930	28630	0.00502
28531-29130	28830	0.0036
28731-29330	29030	0.00225
28931-29560	29230	0.00398
29131-29784	29432	0.0055
29331-29999	29669	0.00859
29561-30204	29893	0.01015
29785-30409	30104	0.01134
30000-30703	30309	0.00886
30205-30931	30521	0.01126
30410-31132	30808	0.01194
30704-31434	31031	0.016
30932-31640	31334	0.01135
31133-31840	31540	0.01173
31435-32041	31740	0.00967
31641-32246	31940	0.01499
31841-32501	32141	0.01603
32042-32715	32395	0.01615
32247-32951	32606	0.01186
32502-33175	32851	0.00931
32716-33392	33073	0.00924
32952-33617	33279	0.01235
33176-33838	33507	0.01725
33393-34059	33728	0.02222
33618-34311	33949	0.0256
33839-34544	34196	0.02216
34060-34787	34434	0.01953
34312-34998	34679	0.01218
34545-35204	34893	0.01227
34788-35471	35098	0.01061
34999-35699	35366	0.01547
35205-35968	35588	0.01712
35472-36203	35805	0.0146
35700-36448	36084	0.0113
35985-36655	36326	0.01175
36204-36882	36555	0.0139
36449-37098	36772	0.01325
36656-37326	36998	0.00996
36883-37530	37204	0.00674
37099-37730	37430	0.00542
37327-37930	37630	0.00473
37531-38130	37830	0.00331
37731-38330	38030	0.00324
37931-38530	38230	0.0011
38131-38730	38430	0.0013
38331-38930	38630	0.00115
38531-39130	38830	0.00154
38731-39330	39030	0.00435
38931-39530	39230	0.00526
39131-39730	39430	0.00585
39331-39943	39630	0.00471
39531-40248	39830	0.01798
39731-40467	40148	0.01854
39944-40695	40348	0.02245
40249-40898	40594	0.00974
40468-41522	40795	0.01442
40696-41748	41044	0.01326
40899-41960	41642	0.01701
41523-42177	41860	0.01402
41749-42377	42068	0.01059
41961-42581	42277	0.00858
42178-42781	42477	0.00574
42378-42981	42681	0.0062
42582-43181	42881	0.00402
42782-43381	43081	0.00502
42982-43581	43281	0.00424
43182-43781	43481	0.00365
43382-43981	43681	0.00336
43582-44181	43881	0.00417
43782-44381	44081	0.00463
43982-44581	44281	0.00636
44182-44781	44481	0.00509
44382-44981	44681	0.00381
44582-45181	44881	0.00189
44782-45381	45081	0.0013
44982-45581	45281	0.00306
45182-45781	45481	0.00294
45382-45981	45681	0.00373
45582-46181	45881	0.00235
45782-46381	46081	0.00216
45982-46581	46281	0.00387
46182-46781	46481	0.00461
46382-46981	46681	0.00522
46582-47186	46881	0.00507
46782-47392	47081	0.00637
46982-47645	47286	0.00725
47187-47858	47499	0.00718
47393-48062	47745	0.00583
47646-48267	47958	0.00871
47859-48472	48167	0.00741
48063-48682	48372	0.00843
48268-48882	48582	0.00366
48473-49089	48782	0.00499
48683-49289	48983	0.00468
48883-49489	49189	0.00676
49090-49689	49389	0.00576
49290-49900	49589	0.00686
49490-50498	49789	0.00755
49690-50699	50026	0.00885
49901-50899	50599	0.00627
50499-51127	50799	0.00662
50700-51333	51012	0.0063
50900-51533	51233	0.00743
51128-51733	51433	0.0051
51334-51946	51633	0.00642
51534-52150	51841	0.00556
51734-52493	52046	0.00721
51947-52716	52268	0.00821
52151-52937	52606	0.01056
52494-53153	52827	0.01074
52717-53367	53042	0.00721
52938-53606	53261	0.0065
53154-53808	53476	0.00521
53368-54052	53706	0.00788
53607-54268	53943	0.00788
53809-54513	54168	0.00787
54053-54723	54408	0.0101
54269-54936	54621	0.01044
54514-55136	54823	0.01002
54724-55336	55036	0.00483
54937-55544	55236	0.00404
55137-55744	55436	0.00538
55337-55944	55644	0.0057
55545-56144	55844	0.00371
55745-56344	56044	0.00297
55945-56544	56244	0.00343
56145-56748	56444	0.00493
56345-57141	56644	0.00749
56545-57348	56870	0.00847
56749-57604	57248	0.01099
57142-57811	57488	0.00929
57349-58055	57704	0.0087
57605-58259	57947	0.00526
57812-58478	58155	0.00734
58056-58679	58361	0.00937
58260-58887	58579	0.01471
58479-59115	58787	0.01699
58680-59315	59007	0.01488
58888-59515	59215	0.01091
59116-59715	59415	0.00705
59316-59915	59615	0.00572
59516-60115	59815	0.00479
59716-60315	60015	0.00336
59916-60515	60215	0.00417
60116-60715	60415	0.00412
60316-60915	60615	0.00517
60516-61115	60815	0.00637
60716-61348	61015	0.0075
60916-61555	61241	0.00794
61116-61755	61455	0.00664
61349-61955	61655	0.00586
61556-62155	61855	0.00569
61756-62355	62055	0.0077
61956-62555	62255	0.0114
62156-62755	62455	0.01135
62356-62955	62655	0.0126
62556-63155	62855	0.01066
62756-63365	63055	0.00966
62956-63580	63262	0.00707
63156-63798	63471	0.00636
63366-64120	63690	0.00616
63581-64320	63899	0.00713
63799-64736	64220	0.00939
64121-64939	64636	0.01004
64321-65139	64839	0.00928
64737-65339	65039	0.00585
64940-65539	65239	0.00409
65140-65739	65439	0.00578
65340-65961	65639	0.01176
65540-66245	65849	0.01615
65740-66445	66089	0.01475
65962-66649	66345	0.00944
66246-66888	66545	0.01223
66446-67092	66787	0.01137
66650-67292	66992	0.01115
66889-67492	67192	0.00652
67093-68272	67392	0.00627
67293-68504	68171	0.00953
67493-68704	68390	0.00804
68273-68904	68604	0.00728
68505-69104	68804	0.00365
68705-69308	69004	0.00402
68905-69508	69208	0.00478
69105-69708	69408	0.00559
69309-69908	69608	0.00922
69509-70108	69808	0.01039
69709-70308	70008	0.01071
69909-70523	70208	0.00703
70109-70723	70415	0.0063
70309-70933	70623	0.00471
70524-71133	70827	0.0037
70724-71333	71033	0.00336
70934-71534	71233	0.00447
71134-71740	71433	0.00724
71334-71981	71634	0.01276
71535-72366	71840	0.01782
71741-72577	72241	0.01895
71991-72795	72477	0.0161
72367-73004	72695	0.01136
72578-73204	72895	0.00805
72796-73481	73104	0.00567
73005-73685	73304	0.00517
73205-73901	73585	0.009
73482-74101	73800	0.01032
73686-74323	74001	0.0139
73902-74536	74214	0.01066
74102-74755	74423	0.0098
74324-75008	74655	0.00728
74537-75214	74855	0.00891
74756-75414	75114	0.00746
75009-75630	75314	0.00822
75215-75830	75530	0.00566
75415-76030	75730	0.00569
75631-76235	75930	0.00478
75831-76458	76131	0.00914
76031-76660	76358	0.01076
76236-76900	76560	0.01002
76459-77119	76800	0.00766
76661-77319	77014	0.00668
76901-77536	77219	0.00835
77120-77744	77425	0.00789
77320-77952	77641	0.00865
77537-78152	77852	0.0061
77745-78368	78052	0.0065
77953-78582	78252	0.00892
78153-78798	78482	0.0123
78369-79005	78682	0.01376
78583-79208	78899	0.01161
78799-79431	79105	0.01143
79006-79632	79308	0.00843
79209-79832	79531	0.00713
79432-80032	79732	0.00463
79633-80232	79932	0.00395
79833-80432	80132	0.00534
80033-80632	80332	0.00583
80233-80832	80532	0.00645
80433-81032	80732	0.00551
80633-81246	80932	0.00576
80833-81446	81132	0.00485
81033-81647	81346	0.00343
81247-81855	81547	0.00176
81447-82061	81755	0.00424
81648-82289	81955	0.00659
81856-82489	82166	0.00967
82062-82705	82389	0.00952
82290-82905	82595	0.00972
82490-83105	82805	0.00701
82706-83305	83005	0.0076
82906-83514	83205	0.00618
83106-83716	83405	0.00542
83306-83923	83616	0.0025
83515-84136	83819	0.0051
83717-84341	84033	0.00757
83924-84541	84236	0.00858
84137-84741	84441	0.00632
84342-84941	84641	0.00766
84542-85201	84841	0.00724
84742-85410	85101	0.00908
84942-85610	85301	0.0076
85202-85816	85510	0.0089
85411-86016	85716	0.00597
85611-86232	85916	0.00585
85817-86432	86116	0.00566
86017-86632	86332	0.00781
86233-86840	86532	0.00884
86433-87074	86740	0.00841
86633-87274	86974	0.00699
86841-87479	87174	0.00664
87075-87679	87379	0.00803
87275-87931	87579	0.00884
87480-88139	87779	0.00793
87680-88344	88039	0.00672
87932-88568	88239	0.00982
88140-88768	88468	0.01096
88345-88970	88668	0.01303
88569-89238	88868	0.01365
88769-89457	89137	0.01618
88971-89678	89346	0.0151
89239-89880	89575	0.0135
89458-90096	89779	0.01107
89679-90296	89992	0.01132
89881-90496	90196	0.01074
90097-90789	90396	0.01344
90297-90989	90602	0.01467
90497-91189	90889	0.01551
90790-91394	91089	0.01646
90990-91598	91294	0.01386
91190-91798	91494	0.00975
91395-91998	91698	0.0023
91599-92198	91898	0.00059
91799-92398	92098	0.00118
91999-92598	92298	0.00137
92199-92798	92498	0.00189
92399-92998	92698	0.0011
92599-93198	92898	0.00091
92799-93398	93098	0.001
92999-93598	93298	0.001
93199-93798	93498	0.001
93399-93998	93698	0.0002
93599-94198	93898	0.00145
93799-94404	94098	0.00164
93999-94607	94304	0.00164
94199-94807	94504	0.0002
94405-95007	94707	0.00039
94608-95207	94907	0.00039
94808-95413	95107	0.0011
95008-95613	95307	0.0011
95208-95813	95513	0.0023
95414-96013	95713	0.00199
95614-96213	95913	0.00159
95814-96413	96113	0.00039
96014-96613	96313	0
96214-96813	96513	0.00051
96414-97013	96713	0.00071
96614-97219	96913	0.00108
96814-97425	97113	0.00145
97014-97631	97325	0.00243
97220-97831	97525	0.00306
97426-98031	97731	0.00316
97632-98231	97931	0.00235
97832-98431	98131	0.00135
98032-98631	98331	0.00056
98232-98831	98531	0.0002
98432-99031	98731	0.0002
98632-99231	98931	0.00039
98832-99431	99131	0.00091
99032-99631	99331	0.0011
99232-99831	99531	0.00142
99432-100031	99731	0.00091
99632-100231	99931	0.00162
99832-100431	100131	0.00142
100032-100631	100331	0.00267
100232-100922	100531	0.00265
100432-101122	100735	0.0027
100632-101333	101022	0.00164
100923-101544	101222	0.00115
101123-101751	101444	0.00453
101334-101966	101651	0.00493
101545-102172	101866	0.00512
101752-102379	102072	0.00235
101967-102579	102279	0.00277
102173-102779	102479	0.00218
102380-102979	102679	0.001
102580-103179	102879	0.00051
102780-103379	103079	0.00051
102980-103579	103279	0.00071
103180-103779	103479	0.00059
103380-103979	103679	0.00059
103580-104179	103879	0.00059
103780-104379	104079	0.0002
103980-104579	104279	0.0002
104180-104779	104479	0.00059
104380-104979	104679	0.00059
104580-105179	104879	0.00059
104780-105379	105079	0.00071
104980-105584	105279	0.00091
105180-105784	105484	0.00091
105380-105984	105684	0.00039
105585-106184	105884	0.00059
105785-106384	106084	0.00078
105985-106606	106284	0.0015
106185-106819	106484	0.00162
106385-107024	106713	0.00255
106607-107270	106924	0.00243
106820-107470	107129	0.00338
107025-107684	107370	0.00385
107271-107884	107578	0.00306
107471-108089	107784	0.00159
107685-108298	107984	0.0002
107885-108498	108198	0.0002
108090-108698	108398	0.0002
108299-108898	108598	0
108499-109098	108798	0
108699-109298	108998	0
108899-109498	109198	0
109099-109698	109398	0
109299-109898	109598	0
109499-110098	109798	0.00039
109699-110300	109998	0.00039
109899-110505	110200	0.00152
110099-110712	110405	0.00191
110301-110918	110605	0.00191
110506-111124	110818	0.00078
110713-111324	111018	0
110919-111528	111224	0
111125-111728	111424	0
111325-111941	111628	0.0002
111529-112145	111832	0.0002
111729-112345	112045	0.00039
111942-112545	112245	0.0002
112146-112745	112445	0.0002
112346-112945	112645	0.0002
112546-113145	112845	0.0002
112746-113345	113045	0.00039
112946-113545	113245	0.0002
113146-113745	113445	0.0002
113346-113945	113645	0
113546-114145	113845	0
113746-114345	114045	0.0002
113946-114545	114245	0.00059
114146-114745	114445	0.00059
114346-114945	114645	0.00039
114546-115145	114845	0
114746-115351	115045	0.0002
114946-115561	115246	0.0002
115146-115775	115461	0.00172
115352-115979	115661	0.00172
115562-116191	115879	0.00294
115776-116401	116090	0.00201
115985-116601	116296	0.00544
116192-116806	116501	0.00441
116402-117019	116702	0.00439
116602-117219	116918	0.00076
116807-117419	117119	0.00056
117020-117619	117319	0.0002
117220-117828	117519	0.00096
117420-118686	117719	0.00473
117620-118886	117952	0.01154
117829-119086	118786	0.01542
118687-119286	118986	0.0171
118887-119500	119186	0.01782
119087-119700	119386	0.01549
119287-119900	119600	0.01217
119501-120100	119800	0.00887
119701-120310	120000	0.00855
119901-120510	120200	0.00951
120101-120710	120410	0.00778
120311-120910	120610	0.00874
120511-121118	120810	0.01337
120711-121352	121017	0.019
120911-121568	121242	0.02286
121119-122024	121462	0.02419
121353-122253	121802	0.02103
121569-122496	122153	0.02168
122025-122720	122353	0.0206
122254-122942	122613	0.02235
122497-123397	122826	0.02081
122721-123619	123046	0.01776
122943-123829	123508	0.01321
123398-124030	123719	0.01051
123620-124230	123930	0.00708
123830-124430	124130	0.01206
124031-124630	124330	0.01316
124231-124838	124530	0.01512
124431-125101	124730	0.02086
124631-125302	124965	0.01977
124839-125502	125202	0.0169
125102-125702	125402	0.00648
125303-125902	125602	0.00669
125503-126102	125802	0.00941
125703-126302	126002	0.01
125903-126502	126202	0.00863
126103-126709	126402	0.0139
126303-126919	126602	0.01321
126503-127119	126819	0.01336
126710-127338	127019	0.00794
126920-127538	127219	0.00676
127120-127743	127438	0.00755
127339-127949	127638	0.00901
127539-128149	127849	0.00874
127744-128349	128049	0.00763
127950-128561	128249	0.00544
128150-128810	128456	0.01002
128350-129010	128661	0.00995
128562-129210	128910	0.00902
128811-129410	129110	0.00629
129011-129610	129310	0.00574
129211-129810	129510	0.00635
129411-130010	129710	0.00543
129611-130235	129910	0.00718
129811-130452	130135	0.00821
130011-130655	130335	0.00909
130236-130870	130552	0.00853
130453-131073	130770	0.00757
130656-131273	130973	0.00483
130871-131473	131173	0.00569
131074-131679	131373	0.00429
131274-131879	131579	0.00591
131474-132079	131779	0.00544
131680-132279	131979	0.00542
131880-132479	132179	0.00591
132080-132679	132379	0.00365
132280-132884	132579	0.00449
132480-133084	132784	0.00429
132680-133313	132984	0.01081
132885-133535	133203	0.01373
133085-133745	133413	0.01605
133314-133990	133645	0.01488
133536-134190	133884	0.0138
133746-134390	134090	0.01179
133991-134590	134290	0.01173
134191-134790	134490	0.01332
134391-134990	134690	0.01225
134591-135193	134890	0.01169
134791-135399	135093	0.01358
134991-135599	135293	0.01624
135194-135805	135499	0.01917
135400-136038	135699	0.01909
135600-136238	135905	0.01961
135806-136438	136138	0.01578
136039-136638	136338	0.01108
136239-136838	136538	0.01113
136439-137038	136738	0.01298
136639-137244	136938	0.01592
136839-137456	137144	0.02219
137039-137662	137344	0.02135
137245-137868	137562	0.02251
137457-138068	137762	0.01833
137663-138283	137968	0.01623
137869-138534	138183	0.01094
138069-138734	138425	0.00426
138284-138934	138634	0.00115
138535-139134	138834	0.0002
138735-139335	139034	0.00076
138935-139552	139234	0.00076
139135-139752	139447	0.00458
139336-139957	139652	0.0048
139553-140163	139857	0.00583
139753-140378	140063	0.00201
139963-140592	140274	0.00294
140164-140792	140478	0.00172
140379-141007	140692	0.00191
140593-141208	140907	0.0002
140793-141408	141108	0.0002
141008-141608	141308	0
141209-141808	141508	0.0002
141409-142008	141708	0.00039
141609-142208	141908	0.00059
141809-142408	142108	0.00039
142009-142608	142308	0.0002
142209-142808	142508	0
142409-143008	142708	0.0002
142609-143208	142908	0.0002
142809-143408	143108	0.00039
143009-143608	143308	0.0002
143209-143808	143508	0.0002
143409-144008	143708	0.0002
143609-144208	143908	0.0002
143809-144421	144108	0.00039
144009-144625	144317	0.0002
144209-144829	144525	0.0002
144422-145029	144725	0
144626-145235	144929	0
144830-145441	145135	0
145030-145648	145335	0.00059
145236-145848	145541	0.00191
145442-146053	145748	0.00191
145649-146255	145953	0.00152
145849-146455	146155	0.00039
146054-146655	146355	0.00039
146256-146855	146555	0.0002
146456-147055	146755	0
146656-147255	146955	0
146856-147455	147155	0
147056-147655	147355	0
147256-147855	147555	0
147456-148064	147755	0.0002
147656-148269	147955	0.0002
147856-148469	148169	0.0002
148065-148683	148369	0.0012
148270-148883	148575	0.00255
148470-149124	148783	0.00385
148684-149329	148983	0.00377
148884-149540	149229	0.00282
149125-149773	149440	0.00243
149330-149973	149673	0.00201
149541-150173	149873	0.00201
149774-150373	150073	0.0013
149974-150573	150273	0.00059
150174-150778	150473	0.00039
150374-150978	150673	0.00039
150574-151178	150878	0.00091
150779-151378	151078	0.00071
150979-151578	151278	0.00091
151179-151778	151478	0.00059
151379-151978	151678	0.00059
151579-152178	151878	0.00039
151779-152378	152078	0.0002
151979-152578	152278	0.00059
152179-152778	152478	0.00059
152379-152978	152678	0.00059
152579-153178	152878	0.00071
152779-153378	153078	0.00051
152979-153578	153278	0.00051
153179-153778	153478	0.00081
153379-153978	153678	0.0012
153579-154185	153878	0.00277
153779-154406	154085	0.00235
153979-154611	154291	0.00216
154186-154824	154506	0.00473
154407-155035	154713	0.00453
154612-155235	154933	0.00473
154825-155522	155135	0.00184
155036-155726	155344	0.00289
155236-155926	155626	0.00301
155523-156126	155826	0.00248
155727-156326	156026	0.00142
155927-156526	156226	0.00162
156127-156726	156426	0.0011
156327-156926	156626	0.00142
156527-157126	156826	0.00091
156727-157326	157026	0.00091
156927-157526	157226	0.00039
157127-157726	157426	0.0002
157327-157926	157626	0.0002
157527-158126	157826	0.00056
157727-158326	158026	0.00154
157927-158526	158226	0.00216
158127-158732	158426	0.00316
158327-158932	158632	0.00306
158527-159144	158832	0.00262
158733-159344	159038	0.00125
158933-159544	159244	0.00056
159145-159744	159444	0.00071
159345-159944	159644	0.00071
159545-160144	159844	0.00051
159745-160344	160044	0.0002
159945-160544	160244	0.00159
160145-160744	160444	0.00199
160345-160950	160644	0.0025
160545-161150	160850	0.0011
160745-161350	161050	0.0011
160951-161550	161250	0.00039
161151-161753	161450	0.00039
161351-161959	161653	0.0002
161551-162159	161853	0.00113
161754-162359	162059	0.00164
161960-162559	162259	0.00145
162160-162759	162459	0.00071
162360-162959	162659	0.001
162560-163159	162859	0.001
162760-163359	163059	0.001
162960-163559	163259	0.00071
163160-163759	163459	0.0011
163360-163959	163659	0.00169
163560-164159	163859	0.00157
163760-164359	164059	0.00118
163960-164559	164259	0.00059
164160-164790	164392	0.00051
